# Supplementary material
Source: ML conference proceedings conference paper supplement (https://openreview.net/forum?id=1IBgFQbj7y)
Supplement: supplementary_material [file attachment]

## Sheet: Sheet1
ColorFeret
	Train	Test	Delta	Loss	Time	Epochs			Generalization (1 epoch)	Precision	Recall	f score
STD1	97.54	86.58	10.96	0.34	01:05:14	211			22.62	1	0.23	0.37
STD2	96.78	81.79	14.99	0.42	00:39:24	127			6.83	1	0.07	0.13
STD3	98.4	85.64	12.76	0.3	01:20:03	259			22.62	1	0.23	0.37
AVG	97.5733	84.67	12.9033	0.353333	01:01:33.667000	199			17.3567	1	0.176667	0.29
Cus1	97.73	90.2	7.53	1.36	00:49:35	159			39.91	1	0.4	0.57
Cus2	98.6	92.22	6.38	1.33	00:58:59	190			22.62	1	0.23	0.37
Cus3	95.98	88.73	7.25	1.39	00:55:44	179			15.95	0.47	0.16	0.24
AVG	97.4367	90.3833	7.05333	1.36	00:54:46	176			26.16	0.823333	0.263333	0.393333
		DIFF	5.85					DIFF	-8.80333
UTKFace
	Train	Test	Delta	Loss	Time	Epochs
STD1	94.55	74.36	20.19	0.39	02:04:57	249			17.64	0.93	0.18	0.3
STD2	95.88	72.67	23.21	0.34	02:30:30	300			8.28	0.99	0.08	0.15
STD3	93.89	76.26	17.63	0.41	02:08:10	256			33.3	0.57	0.33	0.34
AVG	94.7733	74.43	20.3433	0.38	02:14:32.333000	268.333			19.74	0.83	0.196667	0.263333
Cus1	87.43	72.01	15.42	1.62	01:24:40	169			63.4	1	0.63	0.77
Cus2	92.75	75.99	16.76	1.45	01:50:25	220			7.92	0.99	0.08	0.15
Cus3	93.08	77.12	15.96	1.43	01:52:19	224			63.37	1	0.63	0.78
AVG	91.0867	75.04	16.0467	1.5	01:42:28	204.333			44.8967	0.996667	0.446667	0.566667
		DIFF	4.29667					DIFF	-25.1567
